# Supplementary material
Source: Springer Nature journal article supplement (https://www.springermedizin.de/resource/supplementary/13048_2013_194_MOESM4_ESM.pdf/9665082)

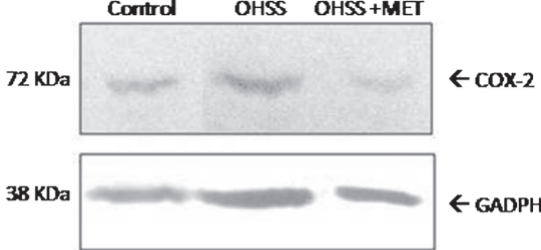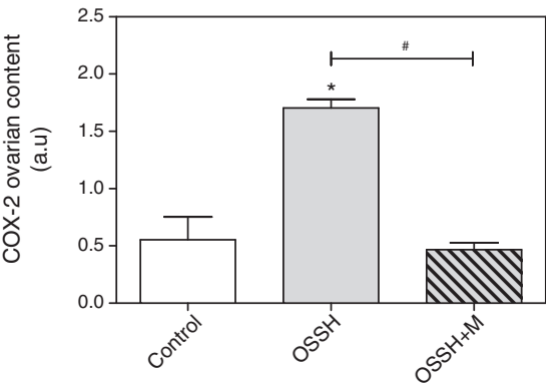

Supplement: MOESM4 [file 9665082]
